## RESEARCH ARTICLE

# Impact of terminal cleaning in rooms previously occupied by patients with healthcare-associated infections

Marc Verhoughstraete<sup>1\*</sup>, Emily Cooksey<sup>1</sup>, Jennifer-Pearce Walker<sup>1</sup>, Amanda M. Wilson<sup>1</sup>, Madeline S. Lewis<sup>2</sup>, Aaron Yoder<sup>1</sup>, Gabriela Elizondo-Craig<sup>1</sup>, Munthir Almoslem<sup>1</sup>, Emily Forsysiak<sup>1</sup>, Mark H. Weir<sup>1,2,3</sup>

**1** Mel and Enid Zuckerman College of Public Health, The University of Arizona, Tucson, Arizona United States of America, **2** Sustainability Institute, The Ohio State University, Columbus, Ohio, United States of America, **3** College of Public Health, The Ohio State University, Columbus, Ohio, United States of America

\* [mverhoughstraete@email.arizona.edu](mailto:mverhoughstraete@email.arizona.edu)

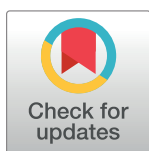

## OPEN ACCESS

**Citation:** Verhoughstraete M, Cooksey E, Walker J-P, Wilson AM, Lewis MS, Yoder A, et al. (2024) Impact of terminal cleaning in rooms previously occupied by patients with healthcare-associated infections. PLoS ONE 19(7): e0305083. <https://doi.org/10.1371/journal.pone.0305083>

**Editor:** Eili Y. Klein, Johns Hopkins University, UNITED STATES OF AMERICA

**Received:** September 18, 2023

**Accepted:** May 23, 2024

**Published:** July 10, 2024

**Peer Review History:** PLOS recognizes the benefits of transparency in the peer review process; therefore, we enable the publication of all of the content of peer review and author responses alongside final, published articles. The editorial history of this article is available here: <https://doi.org/10.1371/journal.pone.0305083>

**Copyright:** © 2024 Verhoughstraete et al. This is an open access article distributed under the terms of the [Creative Commons Attribution License](https://creativecommons.org/licenses/by/4.0/), which permits unrestricted use, distribution, and reproduction in any medium, provided the original author and source are credited.

**Data Availability Statement:** All data are available on GitHub: <https://github.com/mverhoughstraete/HAI-data.git>.

## Abstract

Healthcare associated infections (HAIs) are costly but preventable. A limited understanding of the effects of environmental cleaning on the riskiest HAI associated pathogens is a current challenge in HAI prevention. This project aimed to quantify the effects of terminal hospital cleaning practices on HAI pathogens via environmental sampling in three hospitals located throughout the United States. Surfaces were swabbed from 36 occupied patient rooms with a laboratory-confirmed, hospital- or community-acquired infection of at least one of the four pathogens of interest (i.e., *Acinetobacter baumannii* (*A. baumannii*), methicillin resistant *Staphylococcus aureus* (MRSA), vancomycin resistant *Enterococcus faecalis/faecium* (VRE), and *Clostridioides difficile* (*C. difficile*)). Six nonporous, high touch surfaces (i.e., chair handrail, bed handrail, nurse call button, desk surface, bathroom counter near the sink, and a grab bar near the toilet) were sampled in each room for Adenosine Triphosphate (ATP) and the four pathogens of interest before and after terminal cleaning. The four pathogens of interest were detected on surfaces before and after terminal cleaning, but their levels were generally reduced. Overall, *C. difficile* was confirmed on the desk (n = 2), while MRSA (n = 24) and VRE (n = 25) were confirmed on all surface types before terminal cleaning. After cleaning, only MRSA (n = 6) on bed handrail, chair handrail, and nurse call button and VRE (n = 5) on bathroom sink, bed handrail, nurse call button, toilet grab bar, and *C. difficile* (n = 1) were confirmed. At 2 of the 3 hospitals, pathogens were generally reduced by >99% during terminal cleaning. One hospital showed that VRE increased after terminal cleaning, MRSA was reduced by 73% on the nurse call button, and VRE was reduced by only 50% on the bathroom sink. ATP detections did not correlate with any pathogen concentration. This study highlights the importance of terminal cleaning and indicates room for improvement in cleaning practices to reduce surface contamination throughout hospital rooms.

**Funding:** The US Centers for Disease Control and Prevention (CDC) provided support towards the project design, protocol development, and technical review this manuscript (75D30118C02916). The CDC did not have a role in the data collection or analysis.

**Competing interests:** The authors have declared that no competing interests exist.

## Introduction

Healthcare associated infections (HAIs) pose risks to hospitalized patients, with 4.5% of U.S. hospitalized patients obtaining an HAI during their stay [1], resulting in annual excess costs of \$30 billion to the healthcare sector [2]. Along with direct outcomes of HAI occurrence, an indirect consequence is the continued reliance on antibiotic to treat HAIs. Among HAI pathogens, antibiotic resistance is observed in *Acinetobacter baumannii* (*A. baumannii*), methicillin resistant *Staphylococcus aureus* (MRSA), vancomycin resistant *Enterococcus faecalis/faecium* (VRE), and *Clostridioides difficile* (*C. difficile*) [3–6]. Direct measurements of these pathogens can be costly and timely, and thus proxies for general cleanliness are often used, such as adenosine triphosphate (ATP). ATP is a biochemical indicator of biological material. Despite ATP being characteristic of bacterial metabolism and regularly utilized as a cleanliness tool, its measurements have been shown to be poorly correlated with pathogens in healthcare settings [7], making it a questionable proxy for environmental cleanliness and HAI risk.

Hand hygiene and surface cleaning are currently the primary interventions to prevent HAIs. Hand hygiene education efforts initially increase staff awareness and compliance, but this effect decreases overtime, reducing its effectiveness as an HAI mitigation strategy and putting overreliance on one intervention [8, 9]. Surface cleaning research that addresses real-world efficacy rates, compliance rates, and predicted impacts on patient health is lacking [10]. Despite limited data quantifying the impacts of surface cleaning efficacies and compliance rates on HAIs, it is well acknowledged that surfaces have the potential to harbor pathogens which contribute to indirect transmission [11, 12]. Specifically, high touch surfaces (e.g., bed handrails and nurse call remotes) and soft surfaces (e.g., sheets and curtains) have been shown to play a significant role in pathogen transmission in healthcare settings [13–17]. Additionally, there is evidence of increased risk of contracting a HAI from exposure to the associated pathogen if the previous room occupant was infected with the same pathogen [18, 19].

Terminal cleaning protocols have varying levels of real-world efficacy in reducing HAI causing pathogens on surfaces and subsequent HAI cases [20]. Using hypochlorite solutions, *C. difficile* infection (CDI) rates were reduced to <3.7 per 1000 cases [21, 22] and bioburden levels on surfaces were reduced by 50% [23]. MRSA bioburden levels were decreased below detectable levels on 98.8% of surfaces using hydrogen peroxide vapor, but terminal cleaning with detergent-based (containing 5–15% non-ionic surfactant and 5–15% cationic surfactant) only decreased MRSA below detectable levels on 44% of surfaces [24]. VRE is challenging to remove by cleaning, even with bleach solutions in hospital settings [25, 26]. Many HAI and surface cleaning studies focus on one or two pathogens rather than a suite of HAI causative agents. Assessing HAI pathogen prevalence and survivability in healthcare environments allows for a better understanding of the role that surface cleaning has in the reduction of pathogen exposures across multiple types of HAI associated pathogens.

HAIs continue to plague hospitals despite increased hand and environmental hygiene efforts which act as single transmission stop points [9]. To investigate underlying causes of this persistent public health problem, opportunities for infection via multiple pathogens and infection control strategies for addressing multiple pathogens need to be examined. Therefore, this study involved the quantification of surface concentrations for four HAI associated pathogens before and after terminal cleaning. The objectives were to 1. Quantify *C. difficile*, MRSA, *A. baumannii*, and VRE on surfaces of hospital rooms previously occupied by a confirmed infected patient before and after terminal cleaning using culture-based methods, 2) confirm culture results using mass spectrometry, and 3) compare confirmed results to ATP measurements.

## Scope of research

This research was designed to assess the overall effectiveness of terminal cleaning (e.g., final room cleaning when a patient vacates and before a new patient occupies the room) on the retention of four HAI causing bacteria in patient rooms. An additional objective of determining the efficacy of using ATP to validate the cleaning of rooms was included. The study was conducted at three hospitals in AZ, OH, and GA. In environmental health science practice, the lower the retention (higher reduction) of bacteria in the room, the lower the risk to the next occupant. Thus, this is an initial study critical to improving our understanding of exposure pathways and eventually health risks associated with remaining HAI pathogens.

## Methods

### Sample site selection

Surface samples were collected from three total hospitals located in the Southwest (Arizona) (hospital 1), Midwest (Ohio) (hospital 2), and Southeast (Georgia) (hospital 3) regions of the United States. Patient rooms were selected for surface sampling if the patient being discharged had a laboratory-confirmed infection with at least one of the study target pathogens. Environmental sampling pre-cleaning was performed after the patient was discharged but prior to terminal cleaning. Environmental sampling post-cleaning was performed immediately after terminal cleaning and before the next patient occupied the room. Researchers were not provided any information on the time since daily cleaning prior to discharge or on the patient, beside the identified pathogen. No patient data was recorded.

Six nonporous, high touch surfaces were sampled in each room before and after terminal cleaning and informed by touch frequencies measured in hospitals [27–29]. The six surfaces (i.e., chair handrail, bed handrail, nurse call button, desk surface, bathroom counter near the sink, and a grab bar near the toilet) were preselected for sampling in all hospital rooms. Descriptions of the surfaces are presented in Table 1.

Terminal cleaning protocols for each of the three hospitals were compared. The protocol for hospital 1 indicated use of unspecified germicidal wipes for bathroom and surfaces throughout patient room and instructed bleach specific wipes be used for *C. difficile* positive patient rooms. The protocol for hospital 2 indicated the use of Clorox bleach wipes and Versasure wipes (quaternary ammonium chloride based, Chlorox® Healthcare®) for all surfaces in all rooms. The protocol for hospital 3 indicated use of unspecified germicidal wipes for bathroom and surfaces throughout patient room and no additional measures for high-risk scenarios.

### Surface sampling

Surfaces were sampled for microorganisms using sterile cellulose sponge sticks pre-wetted with 10 mL neutralizing buffer (Fisher Scientific, NC1536284). As a result of shipping delays

**Table 1. Description of surface samples.**

| Surface               | Description                                           | Surface area dimensions (cm) | Sampled area (cm <sup>2</sup> ) |
|-----------------------|-------------------------------------------------------|------------------------------|---------------------------------|
| Bathroom counter sink | Sink located in patient bathroom                      | 35.6 x 50.8                  | 100                             |
| Bed handrail          | Rail attached to patient bed used for patient support | 99.1 x 4.45 x 5.08           | 100                             |
| Chair handrail        | Chair located in patient room                         | 53.3 x 5.08                  | 100                             |
| Desk                  | Patient desk located near bed                         | 38.1 x 85.1                  | 100                             |
| Nurse call button     | Nurse call remote located at patient bed              | 7.62 x 20.3                  | 113                             |
| Toilet grab bar       | Bar located near toilet for patient support           | 20.3 x 5.08 x 3.81           | 100                             |

<https://doi.org/10.1371/journal.pone.0305083.t001>

of material, a small subset of samples ( $n = 14$ ) were collected using cellulose sponge sticks pre-wetted with 10 mL Lethen broth and were processed immediately after collection. All surfaces were assayed for ATP (SystemSURE Plus, Hygiene LLC, Camarillo, CA, USA) before and after terminal cleaning in an area ( $100 \text{ cm}^2$ ) adjacent to microorganism sampling area. Based on previous research to maximize recovery potential from the surface sampling, each surface was sampled for microorganisms and ATP over  $100 \text{ cm}^2$  for all items except the nurse call button [30]. The nurse call button was divided into  $113 \text{ cm}^2$  quadrants to simplify sampling due to asymmetrical shape. For surfaces smaller than  $100 \text{ cm}^2$ , the surface area was measured and divided in half, then the results were converted to microorganisms per  $100 \text{ cm}^2$ . Environmental parameters (temperature and relative humidity) were recorded for each room at the time of sampling. A negative control was performed for each sampling event. This was completed by opening a swab, breaking the sponge end off into the bag, and leaving the sponge in the bag during room sampling. The bag was then closed and processed in the laboratory alongside the surface samples.

Samples were stored at  $4^\circ \text{C}$  and processed within 24 hours of collection. The plastic stick was removed from each sample and 45 mL of sterile 1x (phosphate buffered saline + 0.02% polysorbate 80) PBST were added to each sample. Sponges were agitated for 1 minute at 200 RPM in a stomacher (Seward stomacher 400 circulator, West Sussex, United Kingdom). Sponges were aseptically squeezed to remove remaining liquid, and sponges were discarded. Liquid was transferred to sterile 50 mL conical centrifuge tubes and centrifuged for 20 minutes at  $2700 \times g$ . Supernatant was pipetted out to a final volume of 5–7.5 mL, the tubes were vortexed for 2 minutes to dislodge the pellet into the remaining supernatant, and the final volume measured and recorded.

### Microbial analysis

Each sample was quantitatively assayed for presence of *A. baumannii*, MRSA, VRE, and *C. difficile*. Sample eluent was spread plated in duplicate ( $500 \mu\text{L}$  per plate) onto the appropriate selective media for each organism. CHROMagar<sup>TM</sup> *Acinetobacter* media (DRG International Inc.) was used for isolation of *Acinetobacter* spp. with red colonies counted as positive colonies. HardyCHROM<sup>TM</sup> MRSA agar (Hardy Diagnostics) was used to isolate methicillin-resistant *S. aureus* with deep pink to magenta colonies counted as positive. CHROMagar<sup>TM</sup> VRE (DRG International Inc.) was used to isolate vancomycin resistant *E. faecalis/faecium* with pink to mauve colonies counted as positive. Samples plated onto CHROMagar<sup>TM</sup> *Acinetobacter*, HardyCHROM<sup>TM</sup> MRSA, and CHROMagar<sup>TM</sup> VRE were incubated at  $37 \pm 2^\circ \text{C}$  for 24–48 hours. Cycloserine Cefoxitin Fructose Agar with Horse Blood and Taurocholate (CCFA-HT, Anaerobe Systems) was used for isolation of *C. difficile* with large, grey, slightly filamentous, and low umbonate to flat colonies counted as positive. Samples plated onto CCFA-HT media were incubated at  $37 \pm 2^\circ \text{C}$  for 48–72 hours under anaerobic conditions created using anaerobic chambers and multiuse sachets (BD Diagnostics). The number of colonies that grew on each selective media was used to define the presumptive concentration for each organism and surface. All culture results were presented as CFU/area. Presumptive results are presented to highlight the need for confirmation testing when performing HAI associated pathogen assessment with selective media.

Confirmation testing was completed for *C. difficile*, MRSA, or VRE. For any *C. difficile*, MRSA, or VRE growth on respective selective media, three representative colonies were chosen and frozen in a 1 to 4 tryptic soy broth to glycerol freezing media and stored at  $-80^\circ \text{C}$ . If CFU/sample was less than three, as many colonies as available were frozen and stored. The genus and species of frozen colonies were confirmed using matrix assisted laser desorption/

ionization–time of flight (MALDI-TOF) mass spectrometry (Bruker MALDI Biotyper). This testing confirmed visual assessments of colonies from selective media and identification of pathogens. Confirmation testing was not completed for *Acinetobacter* spp. Non-*Acinetobacter* organisms (e.g. *Pseudomonas* and *Sphingomonas*) may grow on the CHROMagar™ *Acinetobacter* media. However, such occurrences would be most expected from wet surfaces such as around sinks or from biofilm samples. From the dry hospital surfaces targeted in this study, non-*Acinetobacter* growth on the selective media was not expected and therefore additional confirmation of isolates was not performed. A sample was considered a confirmed detection when 1) a sample had at least one presumptive CFU on selective agar and 2) at least one presumptive CFU was confirmed as the target pathogen through MALDI-TOF. The final confirmed concentration for each organism was calculated using the presumptive concentration multiplied by the fraction of isolates confirmed positive through MALDI-TOF assessment with results presented as CFU/swabbed area.

### Statistical analysis

Statistical analysis was completed using R version 3.5.1 ([r-project.org](http://r-project.org)). Descriptive statistics on pathogen concentrations and percent positive were calculated for each organism by surface and location. An assessment of the mean microbial reductions across all surfaces and hospitals was performed to identify significant organismal reductions following terminal cleaning. Due to the small, confirmed sample size, bacterial concentrations across surfaces and hospitals was not performed.

## Results

### Environmental sampling

During this project, 36 sampling events occurred across three hospitals with each event involving the swabbing of six surfaces before and after terminal cleaning ( $N_{\text{surface swabs}} = 432$  samples), and each sample was processed for four microorganisms ( $N_{\text{total assays}} = 1,728$ ). Across all samples, the highest pre-cleaning concentrations (presumptive and confirmed) were all from MRSA (chair handrail, nurse call button, toilet grab bar). After terminal cleaning, the highest presumptive concentrations were from MRSA on the nurse call button. After terminal cleaning, the bed handrail and nurse call button both had measurable MRSA and VRE concentrations. The presumptive and confirmed metadata for all hospitals, pathogens, and surfaces is provided in [Table 2](#). The major surfaces of concern across all hospitals were the desk surface and the nurse call button where 21 rooms had measurable confirmed concentrations of at least one organism pre-cleaning. Post-cleaning, confirmed organisms were detected on the nurse call button ( $n = 4$ ), the toilet grab bar ( $n = 3$ ), chair handrail ( $n = 2$ ), bed handrail ( $n = 2$ ), and the bathroom counter sink ( $n = 1$ ). No organisms were detected post-cleaning on the desk surfaces. VRE was detected on the toilet grab bar in two rooms and the bed handrail in one room which did not have detectable VRE pre-cleaning. When the post-cleaning, confirmed concentration of all three hospitals were investigated, no significant differences by surface or by location were identified. Although there were no significant differences, mean concentrations for the nurse call button and toilet grab bar were highest of all surfaces and mean MRSA and VRE concentration were highest of all organisms.

At the individual hospital level, hospital 1 had the highest pre-cleaning concentrations for *C. difficile* on toilet grab bars, MRSA on chair handrails, and MRSA on nurse call button. After cleaning, the highest confirmed concentrations included MRSA on chair handrails, MRSA on nurse call button, and VRE on bed handrail. At hospital 2, the highest presumptive concentrations were observed pre-cleaning on the bed handrail (*C. difficile*) and post-cleaning on the

**Table 2. Presumptive and confirmed geometric mean concentrations (CFU 100 cm<sup>-2</sup>) for the four targeted organisms on surfaces of all hospitals before and after terminal cleaning.**

| Organism             | Location              | Pre-cleaning surface concentrations (CFU 100 cm <sup>-2</sup> ) |           | Post-cleaning surface concentrations (CFU 100 cm <sup>-2</sup> ) |           |
|----------------------|-----------------------|-----------------------------------------------------------------|-----------|------------------------------------------------------------------|-----------|
|                      |                       | Presumptive                                                     | Confirmed | Presumptive                                                      | Confirmed |
| <i>Acinetobacter</i> | Bathroom counter sink | 0.35                                                            | NC        | <0.08                                                            | NC        |
|                      | Bed handrail          | <0.08                                                           |           | <0.08                                                            |           |
|                      | Chair handrail        | <0.08                                                           |           | <0.08                                                            |           |
|                      | Desk                  | <0.08                                                           |           | <0.08                                                            |           |
|                      | Nurse call button     | <0.07                                                           |           | 0.00                                                             |           |
|                      | Toilet grab bar       | <0.08                                                           |           | <0.08                                                            |           |
| <i>C. difficile</i>  | Bathroom counter sink | <0.08                                                           | <0.08     | <0.08                                                            | <0.08     |
|                      | Bed handrail          | 0.11                                                            | <0.08     | <0.08                                                            | <0.08     |
|                      | Chair handrail        | 0.14                                                            | <0.08     | <0.08                                                            | <0.08     |
|                      | Desk                  | <0.08                                                           | <0.08     | <0.08                                                            | <0.08     |
|                      | Nurse call button     | <0.07                                                           | <0.08     | <0.07                                                            | <0.07     |
|                      | Toilet grab bar       | 0.24                                                            | <0.08     | <0.08                                                            | <0.08     |
| MRSA                 | Bathroom counter sink | 0.67                                                            | 0.19      | <0.08                                                            | <0.08     |
|                      | Bed handrail          | 0.35                                                            | <0.08     | 0.09                                                             | <0.08     |
|                      | Chair handrail        | 1.75                                                            | 1.41      | <0.08                                                            | <0.08     |
|                      | Desk                  | 0.69                                                            | 0.41      | 0.14                                                             | <0.08     |
|                      | Nurse call button     | 1.36                                                            | 1.20      | 1.21                                                             | 0.28      |
|                      | Toilet grab bar       | 1.07                                                            | 0.09      | 0.09                                                             | <0.08     |
| VRE                  | Bathroom counter sink | <0.08                                                           | 0.09      | <0.08                                                            | <0.08     |
|                      | Bed handrail          | <0.08                                                           | <0.08     | <0.08                                                            | <0.08     |
|                      | Chair handrail        | 0.08                                                            | <0.08     | <0.08                                                            | <0.08     |
|                      | Desk                  | 0.09                                                            | <0.08     | <0.08                                                            | <0.08     |
|                      | Nurse call button     | <0.08                                                           | <0.08     | <0.07                                                            | <0.07     |
|                      | Toilet grab bar       | 0.12                                                            | <0.08     | 0.10                                                             | 0.15      |

NC: *Acinetobacter* isolates not confirmed for this project; Less than values indicate concentrations were below the limit of detection.

<https://doi.org/10.1371/journal.pone.0305083.t002>

chair handrail (*C. difficile*). However, following MALDI tests, *C. difficile* was not confirmed on any surface, while VRE and MRSA were confirmed on the nurse call button (VRE: pre-cleaning, MRSA: post-cleaning). At hospital 3, the highest presumptive pre-cleaning concentrations were associated with MRSA on the desk and toilet grab bar while the highest presumptive post-cleaning concentrations were associated with MRSA on the nurse call button. The highest confirmed pre-cleaning pathogens (MRSA and VRE only) were found on bathroom counter sink, desk, and toilet grab bar. After terminal cleaning, only MRSA was confirmed on the toilet grab bar.

## Detections

Data from all hospitals included a total of 51 out of 149 confirmed detections pre-cleaning and 12 out of 65 confirmed detections post-cleaning. MRSA, VRE, and *C. difficile* were presumptively detected on every surface type pre-cleaning. However, across all hospitals, MRSA, VRE, and *C. difficile* were ultimately only confirmed on 11.3%, 11.8%, and 1% of pre-cleaning samples, respectively. After cleaning, *C. difficile*, MRSA, and VRE were confirmed on 2.8%, 2.4%, and 0.47% of post-cleaning samples, respectively, and were found on all surfaces except the desk. The nurse call button had four combined confirmed detections post-cleaning across all

**Table 3. Presumptive and confirmed detections and frequency for pre- and post-cleaning at all hospitals.** A sample was considered a confirmed detection when a sample had at least one presumptive CFU on selective agar and at least one presumptive CFU was confirmed as the target pathogen through MALDI-TOF.

|                       | N   | Pre-cleaning           |                      |                                       |                                     | Post-cleaning          |                      |                                       |                                     |
|-----------------------|-----|------------------------|----------------------|---------------------------------------|-------------------------------------|------------------------|----------------------|---------------------------------------|-------------------------------------|
|                       |     | Presumptive detections | Confirmed detections | Presumptive detection percentage (%)* | Confirmed detection percentage (%)* | Presumptive detections | Confirmed detections | Presumptive detection percentage (%)* | Confirmed detection percentage (%)* |
| <b>Pathogens</b>      |     |                        |                      |                                       |                                     |                        |                      |                                       |                                     |
| <i>Acinetobacter</i>  | 212 | 12                     | 0                    | 5.66                                  | 0.00                                | 7                      | 0                    | 3.30                                  | 0.00                                |
| <i>C. difficile</i>   |     | 39                     | 2                    | 18.4                                  | 0.94                                | 20                     | 1                    | 9.43                                  | 0.47                                |
| MRSA                  |     | 61                     | 24                   | 28.8                                  | 11.3                                | 27                     | 6                    | 12.7                                  | 2.83                                |
| VRE                   |     | 37                     | 25                   | 17.5                                  | 11.8                                | 11                     | 5                    | 5.19                                  | 2.36                                |
| <b>TOTAL</b>          |     | <b>149</b>             | <b>51</b>            |                                       |                                     | <b>65</b>              | <b>12</b>            |                                       |                                     |
| <b>Surfaces</b>       |     |                        |                      |                                       |                                     |                        |                      |                                       |                                     |
| Chair handrail        | 144 | 16                     | 4                    | 11.1                                  | 2.78                                | 12                     | 2                    | 8.33                                  | 1.39                                |
| Bed handrail          |     | 22                     | 7                    | 15.3                                  | 4.86                                | 15                     | 2                    | 10.4                                  | 1.39                                |
| Nurse call button     |     | 25                     | 10                   | 17.4                                  | 6.94                                | 10                     | 4                    | 6.94                                  | 2.78                                |
| Desk surface          |     | 23                     | 11                   | 16.0                                  | 7.64                                | 8                      | 0                    | 5.56                                  | 0.00                                |
| Bathroom sink counter |     | 33                     | 9                    | 22.2                                  | 6.25                                | 9                      | 1                    | 6.25                                  | 0.694                               |
| Toilet grab bar       |     | 30                     | 10                   | 20.8                                  | 6.94                                | 11                     | 3                    | 7.64                                  | 2.08                                |
| <b>TOTAL</b>          |     | <b>149</b>             | <b>51</b>            |                                       |                                     | <b>65</b>              | <b>12</b>            |                                       |                                     |

\*Detection percentage calculated for

- **Pathogen specific surface** detection percentage calculated as: number of samples with CFU (only specific organism and all surfaces) / total pathogen specific samples (6 surfaces\*36 rooms)—Pre-cleaning n = 212; post-cleaning n = 207; e.g. *Acinetobacter* = 12/212 = 5.66%;

- **Surface specific pathogen** detection percentage calculated as: number of samples with CFU (only specific surface and all 4 organisms) / total surface specific samples 144 (4 organisms \* 36 room); e.g. chair handrail = 16/144 = 11.1%

<https://doi.org/10.1371/journal.pone.0305083.t003>

hospitals. A summary of all presumptive and confirmed detections across all hospitals and surfaces is detailed in Table 3.

At hospital 1, VRE was the most frequently detected and confirmed pathogen during post-cleaning surface sampling with the nurse call button having the highest confirmed detection frequency post-cleaning. At hospital 2, tests confirmed one target organism pre-cleaning (VRE on nurse call button) and one target organism post-cleaning (MRSA on the nurse call button). At hospital 3, MRSA on the toilet grab was the only confirmed organism detected post-cleaning.

There was a significant correlation ( $p = 0.008$ ) between ATP and presumptive VRE pre-cleaning concentrations at hospital 1. There were no significant relationships between ATP and other organisms during pre- or post-cleaning at hospital 1 ( $\rho > 0.23$ ). This is highlighted in Fig 1 which shows the ATP measurements along with all presumptive organism detection concentrations pre- and post-cleaning. ATP measures on surfaces were routinely  $>0$  relative light units (RLUs) in the three hospitals before and after cleaning.

Mean microbial reductions across all surfaces were statistically significant ( $p < 0.05$ ) after post-cleaning for *C. difficile* and MRSA at hospital 1, VRE at hospital 2, and *C. difficile* and VRE at hospital 3. There were statistically significant ( $p < 0.05$ ) differences in concentrations before and after cleaning in hospital 1 on the bathroom sink (all organisms) and desk surface (all organisms) and in hospital 3 on the toilet grab bar (VRE), nurse call button (*C. difficile*), and bathroom sink (all organisms). Hospital 1 saw notable reductions in confirmed *Acinetobacter*, MRSA, and *C. difficile*, but VRE increased post-cleaning. This average increase in VRE

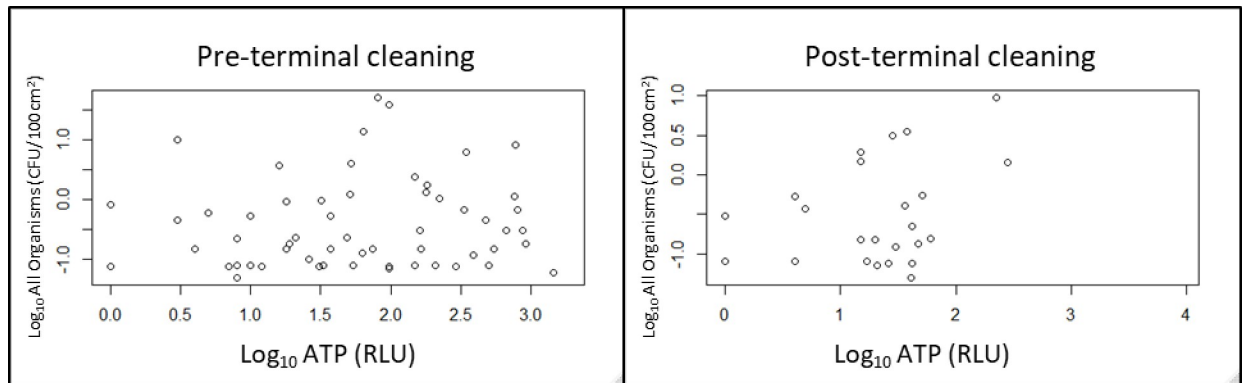

**Fig 1. Scatter plots of ATP versus all microorganism on all surfaces at hospital 1 pre- and post-terminal cleaning.**

<https://doi.org/10.1371/journal.pone.0305083.g001>

was driven by the nurse call button which had higher concentrations post cleaning. Excluding the nurse call button and toilet grab bar, VRE concentrations post-cleaning were 50% lower than pre-cleaning, on average. At hospital 2, VRE was the only organism detected and confirmed (nurse call button) pre-cleaning and was reduced below detectable levels (described as 100% reduction) via terminal cleaning. The lowest percent reductions at hospital 3 were observed for confirmed MRSA on the toilet grab bar (87.5% reduction). A summary of average percent reductions for each organism, surface, and hospital are provided in [Table 4](#).

## Discussion

The environmental sampling of hospital rooms previously occupied by patients with a confirmed MRSA, *C. difficile*, VRE, or *A. baumannii* infection were targeted to quantify the efficacy of terminal hospital cleaning practices on pathogen occurrence. Hospital policy prevented the research team from obtaining data on which target pathogen corresponded with the sampled room, or whether the rooms were ICU or non-ICU rooms. Terminal cleaning protocols differed slightly between the three tested hospitals with two of the three noting practices that would be effective at killing *C. difficile* and one had no mention of specialty practices for any pathogen. Specific information on cleaning practices such as methods of cleaning, cleaning products used, cleaning compliance rates, and the order of surfaces cleaned could not be obtained due to hospital policies. Across all hospitals, terminal cleaning practices generally reduced, but did not completely remove (below detectable limits), surface pathogens and, in some instances, may have introduced pathogens to areas where they were previously absent. However, on an individual hospital level, the number of confirmed organisms above our limit of detection was not large enough to determine the effectiveness of a single terminal cleaning protocol. One limitation of this study is that the cleaning effect of physically wiping in the correct manner in comparison to use of disinfectants could not be assessed. Additional sampling efforts are required to test individual terminal cleaning protocol effects on specific pathogens and surfaces.

Overall, microorganism detections and their concentrations decreased by surface from pre- to post-cleaning. During one sampling event in one room at hospital 1, the confirmed concentration of VRE increased from pre-cleaning (below limit of detection) to post-cleaning (0.15 CFU cm<sup>-2</sup>) sampling. This suggests cross contamination in cleaning hospital rooms is possible and requires further research on the spread of HAIs between fomites during cleaning practices. Surface contamination and transfer of microorganisms between fomites is complicated. While no information was gathered on patient behaviors, EVS cleaning practices and

**Table 4. Average percent reductions for each confirmed organism and surfaces at the three hospitals when organisms were detected before cleaning.** Blank cells indicate no detection.

|                   | Organism                   | Hospital 1 | Hospital 2 | Hospital 3 |
|-------------------|----------------------------|------------|------------|------------|
| OVERALL           | <i>Acinetobacter</i> genus |            | -          |            |
|                   | <i>C. difficile</i>        | 100%       | -          | -          |
|                   | MRSA                       | 94.5%      | -          | 98.9%      |
|                   | VRE                        | 2.78%      | 100.0%     | 100%       |
| Bathroom sink     | <i>Acinetobacter</i> genus | -          | -          | -          |
|                   | <i>C. difficile</i>        | -          | -          | -          |
|                   | MRSA                       | 100%       | -          | 100%       |
|                   | VRE                        | 50.0%      | -          | 100%       |
| Bed handrail      | <i>Acinetobacter</i> genus | -          | -          | -          |
|                   | <i>C. difficile</i>        | -          | -          | -          |
|                   | MRSA                       | 100%       | -          | -          |
|                   | VRE                        | 100%       | -          | -          |
| Chair handrail    | <i>Acinetobacter</i> genus | -          | -          | -          |
|                   | <i>C. difficile</i>        | -          | -          | -          |
|                   | MRSA                       | 99.1%      | -          | -          |
|                   | VRE                        | 100%       | -          | 100%       |
| Desk surface      | <i>Acinetobacter</i> genus | -          | -          | -          |
|                   | <i>C. difficile</i>        | 100.0%     | -          | -          |
|                   | MRSA                       | 100.0%     | -          | 100.0%     |
|                   | VRE                        | 100.0%     | -          | 100.0%     |
| Nurse call button | <i>Acinetobacter</i> genus | -          | -          | -          |
|                   | <i>C. difficile</i>        | -          | -          | -          |
|                   | MRSA                       | 73.43%     | -          | 100.0%     |
|                   | VRE                        | -287.5%*   | 100.00%    | -          |
| Toilet grab bar   | <i>Acinetobacter</i> genus | -          | -          | -          |
|                   | <i>C. difficile</i>        | -          | -          | -          |
|                   | MRSA                       | 100.0%     | -          | 87.5%      |
|                   | VRE                        | 100.0%     | -          | 100.0%     |

NA: No organisms detected before cleaning

\* Negative percent reduction is indicative of either potential growth or cross contamination during terminal cleaning.

<https://doi.org/10.1371/journal.pone.0305083.t004>

behaviors, frequency and duration of environmental cleaning, frequency of healthcare worker visit to patient room, airflow within hospital rooms, overall patient colonization rates in each hospital, infection prevalence rates at time of admission in each hospital, or average length of stay, these factors warrant future assessment as they could contribute to the transfer of pathogens between fomites. Future studies should also examine the role of cloth material and detergent wipes [31] and the surface roughness [32, 33] in this transfer continuum. Increases in concentration following terminal cleaning could also indicate disaggregation during cleaning, increasing detectable CFUs. Given each of the three hospital cleaning protocols call for germicidal agents, the environmental sampling suggests additional cleaning efforts or prescribed surface cleaning orders are required to reduce pathogen occurrence and/or cross-contamination.

The desk was the only surface post-cleaning where no organisms were confirmed whereas the nurse call button and the toilet grab bar exhibited the highest post-cleaning confirmed rates of any surfaces. This may suggest surface accessibility plays a role in cleaning effectiveness. That is, flat and open surfaces (e.g., desk surface) are easier to clean than surfaces with small topographic intricacies, electronic interfaces (e.g., nurse call button), or surfaces in

difficult to reach spaces (e.g., toilet grab bar). Additionally, discrepancies in cleaning may result in surfaces not being sufficiently cleaned, as previously indicated by high variability in surface cleaning efficacy within a hospital setting [34]. In this study all three hospitals demonstrated that no statistically significant differences were seen in confirmed concentrations between pre-cleaning and post-cleaning, regardless of location. This is likely a result of the low confirmed sample size for all pathogens. Further studies assessing the method of cleaning and role of cleaning staff would provide necessary information to better understand differences in surface cleanliness.

ATP results from the current study were not a reliable indicator of pathogen presence or cleaning efficacy. Across all hospitals, ATPs were measured on nearly all surfaces before and after cleaning. This supports prior hospital studies in the USA [35, 36], and Brazil [37] that found no significant relationship of ATP and pathogens. While numerous studies have explored the association between ATP levels and the presence of pathogens in hospital settings, the existing body of literature reveals a spectrum of findings. Some studies report poor relationships [38–41], while others indicate significant associations [42–47] between ATP measurements and pathogen presence. This variability underscores the complexity of assessing cleaning practices and the importance of utilizing multi assessment approaches to understand environmental hygiene. This approach is crucial for refining and enhancing infection control strategies, ultimately contributing to the overall improvement of patient safety in healthcare facilities.

Cleaning interventions are implemented to address broad spectrum HAIs or to target specific pathogens [48]. A broad approach creates challenges in identifying the most effective intervention for a hospital's specific need while a pathogen specific approach may not be protective enough. Further, overlap of interventions does not necessarily result in additive risk reduction, rather there is the potential for interference and inefficiencies. These concerns warrant further mechanistic risk and epidemiologically driven transmission modeling tools to explore and optimize intervention options within a central framework. The data from this current study can help fill such gaps and enhance decision-making capabilities.

## Conclusion

This study demonstrates the potential for terminal hospital cleaning practices to reduce pathogens on high touch surfaces. Eradication of pathogens below detectable levels was not always attained, which is what the preponderance of terminal cleaning protocols and products are designed, developed, and advertised to achieve. ATP measurement did not indicate pathogen presence and should therefore not be used as the only measure of hospital surface safety. The three partner hospitals had terminal cleaning protocols but only one of them specifically addressed *C. difficile*. The variability in cleaning efficacy and potential cross-contamination detected in this study indicates that current terminal cleaning protocols should be amended and standardized to protect patients from being exposed to pathogens left on surfaces by previous patients. Protocols should follow current CDC guidance [49] and should be enhanced to more effectively target MRSA and VRE on surfaces, as these were the most commonly identified microorganisms on surfaces after terminal cleaning. Given the uncertainties related to terminal cleaning's effectiveness, movement to a risk-based framework in which terminal cleaning efforts can be translated to anticipated HAI outcomes is needed.

## Acknowledgments

The authors gratefully acknowledge the generous efforts of Laura Rose and Sujana Reddy who supported project design, protocol development, and technical reviews of the manuscript. The

authors acknowledge and appreciate the environmental sampling and processing efforts from Dr. Lisa Casanova at Georgia State University.

## Author Contributions

**Conceptualization:** Marc Verhougstraete, Mark H. Weir.

**Data curation:** Marc Verhougstraete, Jennifer-Pearce Walker, Amanda M. Wilson, Mark H. Weir.

**Formal analysis:** Marc Verhougstraete, Jennifer-Pearce Walker, Mark H. Weir.

**Funding acquisition:** Marc Verhougstraete, Mark H. Weir.

**Investigation:** Marc Verhougstraete, Emily Cooksey, Jennifer-Pearce Walker, Amanda M. Wilson, Madeline S. Lewis, Mark H. Weir.

**Methodology:** Marc Verhougstraete, Jennifer-Pearce Walker, Amanda M. Wilson, Mark H. Weir.

**Project administration:** Marc Verhougstraete, Jennifer-Pearce Walker, Mark H. Weir.

**Resources:** Marc Verhougstraete.

**Supervision:** Marc Verhougstraete, Mark H. Weir.

**Visualization:** Marc Verhougstraete, Emily Cooksey, Aaron Yoder.

**Writing – original draft:** Marc Verhougstraete, Emily Cooksey, Jennifer-Pearce Walker, Amanda M. Wilson, Aaron Yoder, Gabriela Elizondo-Craig, Mark H. Weir.

**Writing – review & editing:** Marc Verhougstraete, Amanda M. Wilson, Gabriela Elizondo-Craig, Munthir Almoslem, Emily Forsysiak, Mark H. Weir.

## References

1. World Health Organization. Health care-associated infections FACT SHEET. [cited 30 Mar 2021]. Available: [https://www.who.int/gpsc/country\\_work/gpsc\\_ccisc\\_fact\\_sheet\\_en.pdf](https://www.who.int/gpsc/country_work/gpsc_ccisc_fact_sheet_en.pdf)
2. Scott RD. The Direct Medical costs of Healthcare-Associated Infections in U.S. Hospitals and the Benefits of Prevention. Centers for Disease Control and Prevention; 2009.
3. Sakoulas G, Moellering RC. Increasing Antibiotic Resistance among Methicillin-Resistant *Staphylococcus aureus* Strains. *Clinical Infectious Diseases*. 2008; 46: S360–S367. <https://doi.org/10.1086/533592> PMID: 18462091
4. Miller WR, Munita JM, Arias CA. Mechanisms of antibiotic resistance in enterococci. *Expert Review of Anti-Infective Therapy*. Expert Reviews Ltd.; 2014. pp. 1221–1236. <https://doi.org/10.1586/14787210.2014.956092> PMID: 25199988
5. Coyne S, Courvalin P, Périchon B. Efflux-mediated antibiotic resistance in *Acinetobacter* spp. *Antimicrobial Agents and Chemotherapy*. American Society for Microbiology Journals; 2011. pp. 947–953. <https://doi.org/10.1128/AAC.01388-10> PMID: 21173183
6. Spigaglia P. Recent advances in the understanding of antibiotic resistance in *Clostridium difficile* infection. *Ther Adv Infect Dis*. 2016; 3: 23–42. <https://doi.org/10.1177/2049936115622891> PMID: 26862400
7. Shama G, Malik DJ. The uses and abuses of rapid bioluminescence-based ATP assays. *International Journal of Hygiene and Environmental Health*. Urban & Fischer; 2013. pp. 115–125. <https://doi.org/10.1016/j.ijheh.2012.03.009> PMID: 22541898
8. Randle J, Arthur A, Vaughan N, Wharrad H, Windle R. An observational study of hand hygiene adherence following the introduction of an education intervention. *J Infect Prev*. 2014; 15: 142–147. <https://doi.org/10.1177/1757177414531057> PMID: 28989375
9. Dufour JC, Reynier P, Boudjema S, Soto Aladro A, Giorgi R, Brouqui P. Evaluation of hand hygiene compliance and associated factors with a radio-frequency-identification-based real-time continuous automated monitoring system. *J Hosp Infect*. 2017; 95: 344–351. <https://doi.org/10.1016/j.jhin.2017.02.002> PMID: 28262433

10. Weinstein RA, Hota B. Contamination, disinfection, and cross-colonization: Are hospital surfaces reservoirs for nosocomial infection? *Clinical Infectious Diseases*. 2004; 39: 1182–1189. <https://doi.org/10.1086/424667> PMID: 15486843
11. Bartley JM, Olmsted RN. Reservoirs of pathogens causing health care-associated infections in the 21st Century: Is renewed attention to inanimate surfaces warranted? *Clin Microbiol Newsl*. 2008; 30: 113–117. <https://doi.org/10.1016/j.clinmicnews.2008.07.001>
12. Kramer A, Schwebke I, Kampf G. How long do nosocomial pathogens persist on inanimate surfaces? A systematic review. *BMC Infectious Diseases*. 2006. <https://doi.org/10.1186/1471-2334-6-130> PMID: 16914034
13. Bhalla A, Pultz NJ, Gries DM, Ray AJ, Eckstein EC, Aron DC, et al. Acquisition of nosocomial pathogens on hands after contact with environmental surfaces near hospitalized patients. *Infect Control Hosp Epidemiol*. 2004; 25: 164–167. <https://doi.org/10.1086/502369> PMID: 14994944
14. Verity P, Wilcox MH, Fawley W, Parnell P. Prospective evaluation of environmental contamination by *Clostridium difficile* in isolation side rooms. *Journal of Hospital Infection*. 2001; 49: 204–209. <https://doi.org/10.1053/jhin.2001.1078> PMID: 11716638
15. Sexton JD, Wilson AM, Sassi HP, Reynolds KA. Tracking and controlling soft surface contamination in health care settings. *Am J Infect Control*. 2018; 46: 39–43. <https://doi.org/10.1016/j.ajic.2017.08.002> PMID: 28916372
16. Ray AJ, Hoyer CK, Taub TF, Eckstein EC, Donskey CJ. Nosocomial transmission of vancomycin-resistant *enterococci* from surfaces. *Journal of the American Medical Association*. American Medical Association; 2002. pp. 1400–1401. <https://doi.org/10.1001/jama.287.11.1395>
17. Dancer SJ. The role of environmental cleaning in the control of hospital-acquired infection. *Journal of Hospital Infection*. 2009; 73: 378–385. <https://doi.org/10.1016/j.jhin.2009.03.030> PMID: 19726106
18. Huang SS, Datta R, Platt R. Risk of acquiring antibiotic-resistant bacteria from prior room occupants. *Arch Intern Med*. 2006; 166: 1945–1951. <https://doi.org/10.1001/archinte.166.18.1945> PMID: 17030826
19. Wilson APR. The role of the environment in the spread of healthcare associated infections. *Journal of Hospital Infection*. 2018; 100: 363–364. <https://doi.org/10.1016/j.jhin.2018.09.013> PMID: 30267741
20. Coppin JD, Villamaria FC, Williams MD, Copeland LA, Zeber JE, Jinadatha C. Increased time spent on terminal cleaning of patient rooms may not improve disinfection of high-touch surfaces. *Infect Control Hosp Epidemiol*. 2019; 40: 605–606. <https://doi.org/10.1017/ice.2019.44> PMID: 30905326
21. Mayfield JL, Leet T, Miller J, Mundy LM. Environmental control to reduce transmission of *Clostridium difficile*. *Clinical Infectious Diseases*. 2000; 31: 995–1000. <https://doi.org/10.1086/318149> PMID: 11049782
22. McMullen KM, Zack J, Coopersmith CM, Kollef M, Dubberke E, Warren DK. Use of hypochlorite solution to decrease rates of *Clostridium difficile*-associated diarrhea. *Infect Control Hosp Epidemiol*. 2007; 28: 205–207. <https://doi.org/10.1086/511791> PMID: 17265404
23. Barbut F, Menuet D, Verachten M, Girou E. Comparison of the efficacy of a hydrogen peroxide dry-mist disinfection system and sodium hypochlorite solution for eradication of *Clostridium difficile* spores. *Infect Control Hosp Epidemiol*. 2009; 30: 507–514. <https://doi.org/10.1086/597232> PMID: 19379098
24. French GL, Otter JA, Shannon KP, Adams NMT, Watling D, Parks MJ. Tackling contamination of the hospital environment by methicillin-resistant *Staphylococcus aureus* (MRSA): A comparison between conventional terminal cleaning and hydrogen peroxide vapour decontamination. *Journal of Hospital Infection*. 2004; 57: 31–37. <https://doi.org/10.1016/j.jhin.2004.03.006> PMID: 15142713
25. Noble MA, Isaac-Renton JL, Bryce EA, Roscoe DL, Roberts FJ, Walker M, et al. The toilet as a transmission vector of vancomycin-resistant *enterococci*. *Journal of Hospital Infection*. 1998; 40: 237–241. [https://doi.org/10.1016/S0195-6701\(98\)90141-4](https://doi.org/10.1016/S0195-6701(98)90141-4) PMID: 9830594
26. Martinez JA, Ruthazer R, Hansjosten K, Barefoot L, Snyderman DR. Role of environmental contamination as a risk factor for acquisition of vancomycin-resistant *enterococci* in patients treated in a medical intensive care unit. *Arch Intern Med*. 2003; 163: 1905–1912. <https://doi.org/10.1001/archinte.163.16.1905> PMID: 12963563
27. Wang TZ, Simon MS, Westblade LF, Saiman L, Furuya EY, Calfee DP. Quantitative characterization of high-touch surfaces in emergency departments and hemodialysis facilities. *Infect Control Hosp Epidemiol*. 2021; 42: 474–476. <https://doi.org/10.1017/ice.2020.466> PMID: 33021193
28. Huslage K, Rutala WA, Sickbert-Bennett E, Weber DJ. A Quantitative Approach to Defining “High-Touch” Surfaces in Hospitals. *Infection Control & Hospital Epidemiology*. 2010; 31: 850–853. <https://doi.org/10.1086/655016> PMID: 20569115

29. Link T, Kleiner C, Mancuso MP, Dziadkowiec O, Halverson-Carpenter K. Determining high touch areas in the operating room with levels of contamination. *Am J Infect Control*. 2016; 44: 1350–1355. <https://doi.org/10.1016/j.ajic.2016.03.013> PMID: 27160980
30. Weir MH, Shibata T, Masago Y, Cologgi DL, Rose JB. Effect of surface sampling and recovery of viruses and non-spore-forming bacteria on a quantitative microbial risk assessment model for fomites. *Environ Sci Technol*. 2016; 50: 5945–5952. <https://doi.org/10.1021/acs.est.5b06275> PMID: 27154208
31. Ramm L, Siani H, Wesgate R, Maillard JY. Pathogen transfer and high variability in pathogen removal by detergent wipes. *Am J Infect Control*. 2015; 43: 724–728. <https://doi.org/10.1016/j.ajic.2015.03.024> PMID: 25997876
32. Ali S, Moore G, Wilson APR. Effect of surface coating and finish upon the cleanability of bed rails and the spread of *Staphylococcus aureus*. *Journal of Hospital Infection*. 2012; 80: 192–198. <https://doi.org/10.1016/j.jhin.2011.12.005> PMID: 22264495
33. Edwards NWM, Best EL, Connell SD, Goswami P, Carr CM, Wilcox MH, et al. Role of surface energy and nano-roughness in the removal efficiency of bacterial contamination by nonwoven wipes from frequently touched surfaces. *Sci Technol Adv Mater*. 2017; 18: 197–209. <https://doi.org/10.1080/14686996.2017.1288543> PMID: 28469734
34. Carling PC, Bartley JM. Evaluating hygienic cleaning in health care settings: what you do not know can harm your patients. *Am J Infect Control*. 2010; 38: S41–50. <https://doi.org/10.1016/j.ajic.2010.03.004> PMID: 20569855
35. Boyce J, Moore BA. Comparison of fluorescent marker systems with 2 quantitative methods of assessing terminal cleaning practices. 2011. <https://doi.org/10.1086/662626> PMID: 22080657
36. Luick L, Thompson PA, Looock MH, Vetter SL, Cook J, Guerrero DM. Diagnostic assessment of different environmental cleaning monitoring methods. *Am J Infect Control*. 2013; 41: 751–752. <https://doi.org/10.1016/j.ajic.2012.09.019> PMID: 23380380
37. Ferreira AM, Denise de Andrade, Marcelo Alessandro Rigotti, Maria Verônica Ferrareze Ferreira. Condition of cleanliness of surfaces close to patients in an intensive care unit. *SciELO Brasil*. 2011; 19: 557–564. Available: [https://www.scielo.br/scielo.php?pid=S0104-11692011000300015&script=sci\\_arttext](https://www.scielo.br/scielo.php?pid=S0104-11692011000300015&script=sci_arttext)
38. Boyce JM, Havill NL, Dumigan DG, Golebiewski M, Balogun O, Rizvani R. Monitoring the effectiveness of hospital cleaning practices by use of an adenosine triphosphate bioluminescence assay. *Infect Control Hosp Epidemiol*. 2009; 30: 678–684. <https://doi.org/10.1086/598243> PMID: 19489715
39. Watanabe R, Shimoda T, Yano R, Hayashi Y, Nakamura S, Matsuo J, et al. Visualization of hospital cleanliness in three Japanese hospitals with a tendency toward long-term care. *BMC Res Notes*. 2014; 7: 121. <https://doi.org/10.1186/1756-0500-7-121> PMID: 24593868
40. Willis C, Morley R, Westbury J, Greenwood M, Pallett A. Evaluation of ATP bioluminescence swabbing as a monitoring and training tool for effective hospital cleaning. *British Journal of Infection Control*. 2007;8. <https://doi.org/10.1177/1469044607083604>
41. Amodio E, Cannova L, Villafrate MR, Merendino AM, Aprea L, Calamusa G. Analytical Performance Issues. *J Occup Environ Hyg*. 2014; 11: D23–D27. <https://doi.org/10.1080/15459624.2013.852281> PMID: 24369935
42. Aycicek H, Oguz U, Karci K. Comparison of results of ATP bioluminescence and traditional hygiene swabbing methods for the determination of surface cleanliness at a hospital kitchen. *Int J Hyg Environ Health*. 2006; 209: 203–206. <https://doi.org/10.1016/j.ijheh.2005.09.007> PMID: 16503304
43. Cooper RA, Griffith CJ, Malik RE, Obee P, Looker N. Monitoring the effectiveness of cleaning in four British hospitals. *Am J Infect Control*. 2007; 35: 338–341. <https://doi.org/10.1016/j.ajic.2006.07.015> PMID: 17577482
44. Lewis T, Griffith C, Gallo M, Weinbren M. A modified ATP benchmark for evaluating the cleaning of some hospital environmental surfaces. *Journal of Hospital Infection*. 2008; 69: 156–163. <https://doi.org/10.1016/j.jhin.2008.03.013> PMID: 18468725
45. Malik RE, Cooper RA, Griffith CJ. Use of audit tools to evaluate the efficacy of cleaning systems in hospitals. *Am J Infect Control*. 2003; 31: 181–187. <https://doi.org/10.1067/mic.2003.34> PMID: 12734526
46. Mulvey D, Redding P, Robertson C, Woodall C, Kingsmore P, Bedwell D, et al. Finding a benchmark for monitoring hospital cleanliness. *Journal of Hospital Infection*. 2011; 77: 25–30. <https://doi.org/10.1016/j.jhin.2010.08.006> PMID: 21129820
47. Smith PW, Sayles H, Hewlett A, Cavalieri RJ, Gibbs SG, Rupp ME. A study of three methods for assessment of hospital environmental cleaning. *Healthc Infect*. 2013; 18: 80–85. <https://doi.org/10.1071/HI13001>

48. Septimus E, Weinstein RA, Perl TM, Goldmann DA, Yokoe DS. Approaches for Preventing Healthcare-Associated Infections: Go Long or Go Wide? *Infect Control Hosp Epidemiol*. 2014; 35: 797–801. <https://doi.org/10.1086/676535> PMID: 24915206
49. Centers for Disease Control and Prevention. Reduce Risk from Surfaces. In: Healthcare-associated Infections [Internet]. 13 Oct 2020 [cited 3 Nov 2021]. Available: <https://www.cdc.gov/hai/prevent/environment/surfaces.html>
